# Supplementary material for: Accelerating Birth Equity using Collaborative Systems Mapping
Source: Research Square preprint supplement (doi:10.21203/rs.3.rs-4789833/v1), 2024-09-02
Supplement: Supplementary file 1 [file 98737c2149e984e3248d9bfb.docx]

**Search Strategy and Report Extraction**

Pubmed search strings:

((((("Health Equity"[Mesh] OR "health disparities"[tiab] OR "health disparity"[tiab] OR "health care disparities"[tiab] OR "healthcare disparities"[tiab] OR "health-care disparities"[tiab] OR "health care disparity"[tiab] OR "healthcare disparity"[tiab] OR "health-care disparity"[tiab] OR "disparities in health"[tiab] OR "disparity in health"[tiab] OR "equity in health"[tiab] OR "equality in health"[tiab] OR "inequity in health"[tiab] OR "inequities in health"[tiab] OR "inequality in health"[tiab] OR "inequalities in health"[tiab] OR "health equity"[tiab] OR "health equities"[tiab] OR "healthcare equity"[tiab] OR "healthcare equities"[tiab] OR "health-care equity"[tiab] OR "health-care equities"[tiab] OR "health care equity"[tiab] OR "health care equities"[tiab] OR "health equality"[tiab] OR "healthcare equality"[tiab] OR "health-care equality"[tiab] OR "health care equality"[tiab] OR "health inequity"[tiab] OR "health inequities"[tiab] OR "healthcare inequity"[tiab] OR "healthcare inequities"[tiab] OR "health-care inequity"[tiab] OR "health-care inequities"[tiab] OR "health care inequity"[tiab] OR "health care inequities"[tiab] OR "healthcare inequality"[tiab] OR "healthcare inequalities"[tiab] OR "health-care inequality"[tiab] OR "health-care inequalities"[tiab] OR "health care inequality"[tiab] OR "health care inequalities"[tiab] OR "health inequality"[tiab] OR "health inequalities"[tiab] OR "health inequities"[tiab] OR "health inequity"[tiab] OR "health status disparity"[tiab] OR "health status disparities"[tiab] OR "health status equity"[tiab] OR "health status equities"[tiab] OR "health status equality"[tiab] OR "health status equalities"[tiab] OR "health status inequity"[tiab] OR "health status inequities"[tiab] OR "health status inequality"[tiab] OR "health status inequalities"[tiab]) AND (birth)) AND ("Maternal-Child Health Services"[Mesh] OR "Maternal Health"[Mesh] OR "Obstetrics"[Mesh] OR "Prenatal Care"[Mesh] OR "Pregnancy"[Mesh] OR "Pregnant Women"[Mesh] OR "Pregnancy Complications"[Mesh] OR "Postpartum Period"[Mesh] OR "Mothers"[Mesh] OR "Maternal Welfare"[Mesh] OR "Maternal Health Services"[Mesh] OR mother[tiab] OR mothers[tiab] OR maternal[tiab] OR obstetric[tiab] OR obstetrics[tiab] OR prenatal[tiab] OR perinatal[tiab] OR postnatal[tiab] OR peripartum[tiab] OR postpartum[tiab] OR puerperium[tiab] OR pregnant[tiab] OR pregnancy[tiab] OR pregnancies[tiab] OR "first trimester"[tiab] OR "second trimester"[tiab] OR "third trimester"[tiab]) AND (2015:2019[pdat]) AND ("program"[tiab] OR "intervention"[tiab] OR ("best practice"[tiab]))

((((( ((((("Health Equity"[Mesh] OR "health disparities"[tiab] OR "health disparity"[tiab] OR "health care disparities"[tiab] OR "healthcare disparities"[tiab] OR "health-care disparities"[tiab] OR "health care disparity"[tiab] OR "healthcare disparity"[tiab] OR "health-care disparity"[tiab] OR "disparities in health"[tiab] OR "disparity in health"[tiab] OR "equity in health"[tiab] OR "equality in health"[tiab] OR "inequity in health"[tiab] OR "inequities in health"[tiab] OR "inequality in health"[tiab] OR "inequalities in health"[tiab] OR "health equity"[tiab] OR "health equities"[tiab] OR "healthcare equity"[tiab] OR "healthcare equities"[tiab] OR "health-care equity"[tiab] OR "health-care equities"[tiab] OR "health care equity"[tiab] OR "health care equities"[tiab] OR "health equality"[tiab] OR "healthcare equality"[tiab] OR "health-care equality"[tiab] OR "health care equality"[tiab] OR "health inequity"[tiab] OR "health inequities"[tiab] OR "healthcare inequity"[tiab] OR "healthcare inequities"[tiab] OR "health-care inequity"[tiab] OR "health-care inequities"[tiab] OR "health care inequity"[tiab] OR "health care inequities"[tiab] OR "healthcare inequality"[tiab] OR "healthcare inequalities"[tiab] OR "health-care inequality"[tiab] OR "health-care inequalities"[tiab] OR "health care inequality"[tiab] OR "health care inequalities"[tiab] OR "health inequality"[tiab] OR "health inequalities"[tiab] OR "health inequities"[tiab] OR "health inequity"[tiab] OR "health status disparity"[tiab] OR "health status disparities"[tiab] OR "health status equity"[tiab] OR "health status equities"[tiab] OR "health status equality"[tiab] OR "health status equalities"[tiab] OR "health status inequity"[tiab] OR "health status inequities"[tiab] OR "health status inequality"[tiab] OR "health status inequalities"[tiab]) AND (birth)) AND ("Maternal-Child Health Services"[Mesh] OR "Maternal Health"[Mesh] OR "Obstetrics"[Mesh] OR "Prenatal Care"[Mesh] OR "Pregnancy"[Mesh] OR "Pregnant Women"[Mesh] OR "Pregnancy Complications"[Mesh] OR "Postpartum Period"[Mesh] OR "Mothers"[Mesh] OR "Maternal Welfare"[Mesh] OR "Maternal Health Services"[Mesh] OR mother[tiab] OR mothers[tiab] OR maternal[tiab] OR obstetric[tiab] OR obstetrics[tiab] OR prenatal[tiab] OR perinatal[tiab] OR postnatal[tiab] OR peripartum[tiab] OR postpartum[tiab] OR puerperium[tiab] OR pregnant[tiab] OR pregnancy[tiab] OR pregnancies[tiab] OR "first trimester"[tiab] OR "second trimester"[tiab] OR "third trimester"[tiab]) AND ("program"[tiab] OR "intervention"[tiab] OR "blueprint"[tiab] OR "plan"[tiab] OR "strategy"[tiab] OR "framework"[tiab] OR ("roadmap"[tiab]))

Google search strings:

maternal infant health equity community site:.gov

site:.gov maternal AND infant intext: equity OR community OR framework OR program

after: 2018 (maternal health OR infant health) AND (equity OR improvement) AND (community OR local) AND (framework OR plan OR strategy OR blueprint OR roadmap)

Workshop Participant Summary

48 participants from 39 organizations participated in at least one of the national systems mapping workshops. Participants spanned all 10 HHS regions. Organizational representation included:

- 11 community-based organizations
- 11 national organizations (i.e., national advocacy organizations or technical assistance providers)
- 4 state-based non-profit organizations
- 3 local health departments
- 3 federal agencies
- 2 private funders
- 2 state health departments
- 2 academic institutions
- 1 health system

5 R Themes

The5 R’s is a framework used to unpack and understand a system and identify critical contributors to inequity. It captures perspectives on the Results, Roles, Resources, Relationships, and Rules that will lead to (or challenge) success. 29 participants completed the 5 R’s pre-workshop survey related to the birth equity system.

Emergent coding was used to identify common themes across responses, which were revised with input from participants in Workshop #1.

| **Results: What does birth equity look like?** | | |
| --- | --- | --- |
| **Theme** | **Response Examples** |  |
| *Birth equity looks like parity in health outcomes, especially perinatal health outcomes, for all.* | "There are no disparities in key birth outcomes (i.e. preterm birth, maternal health and wellbeing) and patient experience indicators." |  |
| "No person fearing giving birth due to terrible outcomes; for birth to be a joyful experience for all, honoring a person's values and customs" |  |
| "Every birthing person and their communities are safe, healthy and have access to the resources they need and they are all met with integrity, transparency and compassion throughout their life journeys." |  |
| *Birth equity means actual access to healthcare, namely affordability, accessibility, acceptability, and respect for personal choice.* | "Equal and affordable access to birth control, prenatal care, and birth options (home, center, hospital; physician, midwife, doula)" |  |
| "Success is all pregnant women having access to excellent healthcare options and receiving equal care and treatment throughout their pregnancy, resulting in a successful healthy pregnancy, healthy delivery, and a healthy baby" |  |
| "Everyone has the right care they need at the right place at the right time, delivered with respect for their personal choices." |  |
| *Birth equity requires a reproductive justice framework.* | "Birth equity is also about maximizing the amount of choice that everyone has around IF and HOW to give birth and have children." |  |
| "Reduced racial and ethnic disparities in birth outcomes and maternal and infant health, better access to care in marginalized communities, full reproductive freedom for women and girls." |  |
| "Success looks like a maternal healthcare system that includes holistic care, reflects reproductive justice values and in which everyone, including Black and Indigenous (who are currently the most negatively impacted) families thrive." |  |
| *Birth equity requires listening to diverse patient lived experiences; Birth equity looks like families feeling deeply respected, supported, connected, and valued throughout their pregnancy experiences.* | "The following are meaningful results to me: patient experience" |  |
| "Perceived patient care experience during pregnancy, birth, and postpartum period (did you feel emotionally and physically safe, respected, seen, heard, valued, care for)" |  |
| "Unmeasured: birthing families feel greater respect, support and connection to health care and community in general." |  |
| *Birth equity requires data transparency and accountability, including data on health outcomes and patient experiences among healthcare facilities.* | "SOGI data that disaggregates the Asian, Latinx, and Indigenous identities." |  |
| "Measured results would be increasing the number of women delivering beyond 39 weeks gestation; Lowering the c-section rate of women, especially women of color" |  |
| "Hospitals publish their own data about how they are doing." |  |

| **Results: What trends post the biggest threat to achieving birth equity?** | |
| --- | --- |
| **Theme** | **Response Examples** |
| *Structural racism, systemic racism, and racist mental models is the most cited concerning trend.* | "Institutionalized racism and implicit and explicit bias pose the biggest threat to achieving birth equities. Unfortunately, racism is baked into a system that has been designed to keep people sick for monetary gain and institutional power." |
| "The resistance to anti-racism and equity work among some political office holders or people in other positions of power in the health care system pose the biggest threat. For example, in the community where I live, local elected officials have voiced concerns about health equity components to grants and conference we hosted on the topic of achieving birth equity has become the target of falsehoods. For people seeking grants through departments of health, opposition by elected officials will become a barrier to equity work." |
| "Longstanding structural racism is the biggest -- this manifests in a multitude of ways, none of which seem to be getting much better (if getting better at all)" |
| *Actual access to health care, including access to affordable insurance, local providers, and adequate medical infrastructure.* | "Lack of health insurance coverage during pregnancy and postpartum" |
| "Mass closure of medical facilities in urban areas and expensive health insurance." |
| "Inadequate health care providers in rural and other underserved areas; Hospital closures that inhibit access to care; Challenges in obtaining adequate care before, during, and after pregnancy" |
| *Structures, systems, and mental models increasingly threaten health and health care as a basic right.* | "I feel the biggest threat is the lack of empathy towards pregnant women who are not white, and may include white women who are low income, homeless, or abusing substances. The change needs to come from the health professionals to make a real difference in outcomes. Changes should start in med school and nursing school!" |
| "Efforts to criminalize abortion care, forcing women and girls to give birth under circumstances that are disadvantageous and even dangerous to maternal and infant wellbeing." |
| "Anti-abortion legislation. Hostility in the medical system and political leadership toward community midwifery, doulas, birth centers and other community-based options that support a healthy birthing environment." |
| *Politically-driven structures, systems, and mental models increase polarization and discord.* | "Politicization of public health; neoliberal structures and policies; structural racism; lack of universal healthcare; continued rise in white supremacy" |
| "income/wage gaps=income inequity; decreased funding opportunities in communities of color; decreased investment in public education--including scientific and critical thinking" |
| "The backlash movements in response to the Black Lives Matter movement and general "woke"ness; the political divide between Republicans and Democrats, conservatives and liberals" |
| *Lack of availability, accessibility, and sustainability of social and economic supports.* | "rising income disparities" |
| "income/wage gaps=income inequity; decreased funding opportunities in communities of color; decreased investment in public education--including scientific and critical thinking" |
| "Inconsistent investment in assuring that the basic conditions needed to live and thrive, devoid of toxic stress, are in place for all throughout one's life course: stable, high quality, affordable housing and nutrition, quality, nurturing, and affordable education, safe and accessible quality healthcare, thriving and equitable economic opportunity, safe and connected communities, environmental justice." |

| **Results: Where has it been easiest/hardest to enact change?** | |
| --- | --- |
| **Theme** | **Response Examples** |
| *Federal programs that allow flexibility to accommodate community needs facilitates change.* | "I am not sure there has been or is an easy place to advance birth equity. However, I will say there are areas where more success is seen than others. For example communities with a federal Healthy Start program have seen great success with a decrease in not only infant mortality rates but improvement in maternal health outcomes." |
| *Health systems collaborating (and being held accountable) to specifically impact equity facilitates change.* | "Hospital systems engaged in a Perinatal Quality Collaborative initiative that has specific birth equity structure measures in place such as in Illinois are beginning to see improvement in MMM rates." |
| "I have seen Hand to Hold in central Texas work within the hospital to get one on one care for newborns both in and out of discharge as well as support groups for parents." |
| "Hospital system quality improvement programs" |
| *Community-based organizations that are reflective of communities and given the resources/ autonomy to lead the work facilitate change.* | "Community based organizations that focus on midwifery and/doula care, are Black-led and their work centers on equity are also seeing lower or no MMM rates. For example, in DC, Ebony Marcelle with Community of Hope has discussed these results and outcomes across many platforms." |
| "community partners, healthcare advocates CBOs, non-profits, health justice organizations, reproductive justice movements, birthing justice movements, both often and majority-run by women or people of color" |
| "I work at the national level so my perspective is different, but my sense is that advancing birth equity happens when Black and Brown community leaders are driving the work." |
| "I struggle with this question often as I personally reflect on solutions for change. I'm not sure if it's the easiest pathway to enact change to advance birth equity. However, I consider the thought that maybe change is activated when communities with commonalities activate their autonomy and trusted relationships then operate outside of traditional systems. However, I do understand that modern medicine, partnership, and monetary resources are necessary." |
| *Community-based organizations that expand perinatal care provider choice facilitates change.* | "Community based organizations that focus on midwifery and/doula care, are Black-led and their work centers on equity are also seeing lower or no MMM rates. For example, in DC, Ebony Marcelle with Community of Hope has discussed these results and outcomes across many platforms." |
| *Collaboration among partners and communities with shared values and goals facilitates change.* | "It has been easiest to enact change with community partners (both non-profits/CBOs and individual community members/healthcare practitioners) and health-conscious philanthropic foundations that are financially interested in supporting the work." |
| "Among like-minded community partners or those with similar goals" |
| "Working in collaboration with other birth and parent organizations has allowed us to make larger steps toward birth equity together." |
| *Innovative academic environments (i.e., introducing the role of health care providers in advancing birth equity in medical schools) can facilitate change.* | "Innovative academic environments that are able to provide support to populations with poor outcomes" |
| "In my role, the easiest place to make change is in colleges of nursing. Presenting real life situations to students and cut to the chase with bold statements about their role as a healthcare professional is to improve health, not hinder it due to their attitudes towards people. Early intervention with those going into healthcare can greatly advance birth equity (and overall health equity)" |
| *Organizations/ communities with birth equity champions facilitate change.* | "Our community has a Birth Equity workgroup that implements community action through our Fetal Infant Mortality Review. It's been easiest to enact change in the places where there are champions for this work within the organization." |
| *State governmental and political support of advancing birth equity facilitates change.* | "State Title V programs with supportive political environments" |
| "I am fortunate to live in a state that is committed to maternal and child health and reproductive justice. It is easiest to enact change wherever there is government support and provider commitment to these important issues." |
| "We were making very good progress and our state legislature has passed important legislation including expanding postpartum coverage from 60 days to 1 year for mothers covered by Medicaid. Since the 2022 election, our local county government has expressed concern about programs that include a health equity component." |
| "States with political environments that are not supportive of systems change" |
| "In states that are criminalizing abortion care and cutting benefits to marginalized individuals (e.g., SNAP)." |
| *Health systems/hospitals' operations, metrics, and lack of transparency and responsiveness hinders change.* | "Unfortunately, with 98% of births occurring in the hospitals and a significant percentage of MMM occurrences happening here, this is where it is currently difficult to enact broad change around birth equity. There is very little research being conducted on the organizational and systems level factors such as hospital performance and its role in maternal health outcomes. This is a significant gap that needs to be addressed." |
| "The most apparent barrier to enacting change to advance birth equity has been testing implementation while going around the systemic changes that are needed. It's also not helpful when birthing facilities and corporations are not transparent about what is happening to further contribute to the maternal health crisis." |
| *Individual and organizational mental models and cultures rooted in racism, classism, and gender oppression hinders change.* | "Racism, classism, and gender oppression are at the core of why certain systems, policies, and practices are in place and are so difficult to change. We perhaps need more unity to courageously forge through. Or, perhaps, we need more strategy to organize around deliberately and systematically bridging the empathy gap that Dr. David Williams talks about being one of the causes of why these inequitable systems, which are made of people, continue to exist. Examining how pieces of the system inadvertently influence the mechanics of the work also matters (i.e. funding and resource flows, relationships, roles, mental models, etc.) Are we fostering collaboration and synergy? Are we inadvertently fueling competition and fragmentation? Are cumbersome processes getting in the way of our ability to embrace emerging opportunities that are responsive and driven by those closest to the issues and solutions?" |
| "Working in hospital environments where the systemic racism is ingrained and pose a threat to the wellbeing of our clients." |
| "getting people to recognize, care about, and act on structural racism" |
| *Limited resources (social services and medical infrastructure) in communities hinders change.* | "States and localities with limited resources...Areas with a shortage of health care providers...Areas facing hospital closures" |
| "Many times, there are these amazing programs and services we advocate and share within our NHPI communities, but the main priority for are social determinants of health needs. We have individuals working in multiple jobs to provide for a multi-generational household, helping families with their health, transporting families or trying to find transportation for self and families, finding a job, or find housing, etc." |

| **Roles: Who are the key actors that affect or are affected by these results?** | |
| --- | --- |
| **Theme** | **Response Examples** |
| *Individuals, families and communities, especially those with systemically marginalized identities* | “Birthing individuals in marginalized communities, members of racial/ethnic minority groups, persons who use drugs” |
| “Mothers in the most impacted communities.” |
| “Engaging at the community level to raise awareness is key. Pregnant women can also play a key part by gaining knowledge about birth equity and seeking out healthcare professionals that support birth equity.” |
| *Policymakers, legislators, staffers, and advocates* | “Congressional appropriations and HELP committees/processes” |
| “Governmental agencies and philanthropic foundations who hold power in terms of financial resources, influence over policy makers and other key partner stakeholders across sectors well beyond traditional MCH.” |
| “Policymakers, staffers, and advocates whose influence can reach the greatest number of people and systems.” |
| *Employers, corporations, funders, and economic actors* | “Affect/need to engage: business owners and large corporations (Target, Walmart, Costco, etc? who are large employers, funders,” |
| “Governmental agencies and philanthropic foundations who hold power in terms of financial resources, influence over policy makers and other key partner stakeholders across sectors well beyond traditional MCH.” |
| “Honestly, this is a human capital issue and anyone interested in the quality of the labor force should care.” |
| *National non-profits and progressive organizations have more flexibility than governmental agencies to innovate* | “National nonprofits that have members, staff, and partners across the nation and can help accelerate the adoption, spread, and coordination of specific solutions with a greater degree of flexibility compared to governmental agencies. Progressive centers/organizations/researchers/communities who are testing and evaluating novel, groundbreaking, courageous, and common-sensical solutions that can be spread and scaled through above mentioned partners.” |
| *Community-based organizations* | “Community based organizations who directly support families experiencing higher risk of disparities and inequities.” |
| “CBOs...support people (aka the village).” |
| *Health care systems, hospitals, health care providers, and insurance companies* | “Affect/need to engage: providers, health care systems, hospitals/facilities, frontline staff, medical schools” |
| “Insurance companies, daycares and schools, any job field primarily occupied by women/birth capable people” |
| “Health insurance companies and their stakeholders...healthcare providers and their stakeholders.” |
| *Schools, daycares, and other industries primarily occupied by women/birthing people* | “Insurance companies, daycares and schools, any job field primarily occupied by women/birth capable people” |
| *Entertainment, journalism, and communications industries that create and maintain societal narratives* | “Entertainment, journalism, and communications industries who have the power and influence to impact public discourse and narrative shifts.” |
| *Birth workers* | “Midwives, doulas, BIPOC birthing folks, healthcare decision-makers, ob/gyns, legislators.” |

| **Resources: What types of resources are important to help advance birth equity?** | |
| --- | --- |
| **Theme** | **Response Examples** |
| *Advocacy and leadership training/opportunities for communities and families* | “Training opportunities for communities, families to support them in advocating and creating forums for their voices” |
| *Meaningful and transparent data sharing* | “Meaningful and transparent sharing of data from and among/across stakeholders” |
| “Access to data that helps inform narrative” |
| *Strategic, long-term funding and financial resources* | “Money! I know we must think broadly beyond financial resources, but aside from direct services, some people really need money. And for centuries, wealth in this country has been taken through exploitative labor practices (slavery) at the expense of those most affected by the current absence of birth equity we see today (Black and Brown women/birthing people).” |
| “You say think beyond financial but that is the major holdup for the people and organizations already working to advance birth equity. We need more doulas, more midwives, more birth centers, more capacity-building, more childcare. All of that needs strategic, full and long-term funding.” |
| *Shared mental model and commitment to advance birth equity* | “A common framework and commitment.” |
| “An investment in shifting public discourse, narratives, education, and mental models at the local, state, national, and organizational levels. An investment in explicitly recognizing, naming, and healing the harm caused and perpetuated by racism, classism, hatred, and gender oppression.” |
| “Understanding of how failure to achieve equity harms all of us by diminishing our labor force and reducing our capacity to solve problems.” |
| *Advances in health care delivery systems and designs, including the perinatal care workforce* | “The following resources are important to help advance birth equity: ...streamlined pathways of care to tackle system fragmentation, and innovation.” |
| “Aside from money, access to high quality, cultural congruent or at least culturally humble maternal health care personnel and facilities is important for advancing birth equity. This accessibility includes financial, physical parameters, and relational parameters.” |
| *Collaboration and mentorship among those working to innovate and advance birth equity* | “Connections to and easy ways to communicate with each other and other experts and partners. Funding that fosters collaboration, rather than competition. A willingness to examine new ways to eliminate burdensome processes and bureaucracies that can get in the way of effectiveness and expediency.” |
| “Government funding agencies provide tools and mentorships for funding sites to provide more impactful support for the service providers and programs.” |
| *Space and time to be in community with each other* | “Another resource is community. We need the time, space, and leisure (all of which require money) to be able to gather to support each other, learn from each other, and bond with each other. Our shared knowledge and resources currently exist in silos as we all try to make it on our own. However, in community, with all of this knowledge and resources we have inherently compounding on each other, we can thrive.” |
| “Non-hurried time to listen, learn, heal, think, reflect, strategize, connect.” |
| *Expertise from the community and those most impacted* | “Observations from the most marginalized and the front-line staff working with them. This is valuable data and needs to be part of accountability” |

| **Rules: What rules shape birth equity and your approaches to improving outcomes?** | |
| --- | --- |
| **Theme** | **Response Examples** |
| *Status Quo: Mental models of white supremacy and structural racism* | “Our approach is heavily influenced, or approved, by leaders who tend to be White; not understanding structural racism and thinking we can solve problems with programs” |
| “Sadly, many providers and leaders within hospitals and facilities, and health care systems continue to promote the status quo and have become comfortable with maintaining such practices. This belief that we should continue "doing business as usual" is killing women, especially Black women.” |
| “Unequal treatment, Discrimination, Eligibility for insurance, Lack of trust based on historical biases, Unfair housing laws, Unequal job and educational opportunities, Poor neighborhood/living environments” |
| *Status Quo: Funding and grant cycles not supportive of innovation and birth equity* | “Only things that show results in a relatively short amount of time are worth investing in -- this is a rule because people want to see results (immediately or within a short amount of time) -- wanting quick results leads us to work on the most proximal drivers (things like inequities in health care). these approaches are worthwhile, but distract from the long term, deep structural change that is really needed “ |
| “Providing only what can be reimbursed seems to be a theme used historically. We are now looking at building a model regardless of reimbursement and then will look to our legislature to help us create the structure for sustainability with the model that benefits patients regardless of payment.” |
| **“Rules” we need…** | |
| *Centering of the expertise of BIPOC women and birthing people* | “Promoting respectful care is what is needed. Listen to, acknowledge, value, and engage BIPOC women and birthing persons. In my opinion, this is the number one rule. This is where we need to start and enforce consistently. Until we do this, none of the other rules matter. As the lead for the National Network of Perinatal Quality Collaboratives, my team and I are supporting this rule and the approach of respectful and equitable care across all PQCs as they work to advance birth equity and improve outcomes” |
| “Providers and other MCH professionals to buy into adopting AIM standards in the hospital and to examine their policies to ensure equitable access and eliminate bias in care. With mothers and families to learn what solutions and recommendations they have to improve the experience of pregnancy and birth.” |
| *Flexible, human-centered approaches* | “1. Centering the expertise of the lived experiences of Black women (those who are most affected by the lack of birth equity in this country)., 2. Being human centered in design and considering the whole person (i.e.: the intersection of all their identities and the responsibilities and freedoms that come with that), 3. Asking for feedback intentionally and regularly., 4. Being flexible, 5. Thinking abundantly and operating with a spirit of possibility” |
| “Building organizational cultures that support a true commitment to psychological safety and growth mindset amongst its workers, to unleash the potential for meaningful improvement, courageous creativity, human connection, and grace towards oneself and each other.... Expectation to always/regularly question practices and mental models re: are we are truly centering our shared mission, and the lived experience, and priorities of families and community members. How are we doing so? Can we do it better? More often? More respectfully? More meaningfully and impactfully? Can we allow ourselves and our organizations to push the pause and rewind button, in the spirit of growth mindset and human-centered design, when we realize that course corrections need to be made?” |
| *Support for community-led solutions* | “Community involvement is step one and obviously funding is second. We have to know what's short term and long term goals in order to start to make consistent changes.” |
| “Providers and other MCH professionals to buy into adopting AIM standards in the hospital and to examine their policies to ensure equitable access and eliminate bias in care. With mothers and families to learn what solutions and recommendations they have to improve the experience of pregnancy and birth.” |
| “The people closest to the problem have the solutions. It's the job of allies to work alongside affected communities to amplify their voices and solutions to policymakers. This is true at all levels of policy change.” |
| *Strategic trust-based collaborations* | “Trust-based philanthropy practices and policies.... A deep commitment to speaking truth to power, while also recognizing that strategic decisions need to inevitably play a role when navigating different settings, spaces, and audiences... Be committed to the long game, without losing sight of the urgency and very real deep sorrow and grief that families are experiencing when losing an infant, a mother, and community member to preventable causes.” |
| “Continuing building partnership and nurturing that Vā... Investing in our community and building partnership will build trust, an important value that can build bridges in improving birth equity. Moreover, continuing to support the community from beginning to end of the process, and supporting us from the sidelines as we spearhead it on our own will also improve birth equity locally, statewide and nationally.” |
| *Health insurance/ reimbursement rules* | “The credentialing, billing, and administrative process for health insurance/Medicaid is a huge barrier and reimbursement is piecemeal. Reimbursement redlining is upheld by insurers choosing the wrong measures for evaluating quality and safety, which favor the system as is and not the community or community workers.” |
| Current rules push us into an individualized approach - coverage/care for one birthing person, one infant, one caregiver - and not thinking about them together. This makes it hard to operationalize a system supportive of birth equity, as everyone is looked at in isolation, “rather than incentiving family/community wellness.” |

| **Relationships: What key relationships must we focus on to improve birth equity?** | |
| --- | --- |
| **Theme** | **Response Examples** |
| *Hospitals/health care facilities and communities/ community-based organizations need to collaborate to support thriving families* | “Hospitals and facilities need to collaborate with community based organizations” |
| “Hospital and clinic systems need to collaborate with community-based organizations to better understand where they are successfully meeting client needs and where they are perpetuating harms that have been systemically contributing to poor outcomes and how that can be corrected” |
| “Community-based organizations and hospitals, clinics need to collaborate in order to better coordinate and connect patients with resources and education.” |
| *Policymakers and funders need to partner with/listen to community-based organizations as experts in their communities* | “WIC regulations; an example would be in regards to grocery store minimums being altered depending on population size. (One size does not fit all), Reimbursement practices that allow for Community Based support without the Incident to billing regulations” |
| “Funders need to build relationships with grassroots community organizations (particularly those created by impacted community members) and listen to them to get a more accurate idea of what is happening in communities to inform their focus and portfolio.” |
| “Community based organizations need state or federal funding to address community-identified needs.” |
| *Health care providers in training need improved education on their role in achieving birth equity* | “Improve the knowledge of medical students/residents in OB/nursing students on the need to be aware of needs of their patients and not disregards them due to race/ethnicity” |
| “Healthcare schools of learning because there will always be knew people being trained and we should talk with them” |
| “Academia/teaching institutions need to implement improved curriculum, addressing racism and bias, for medical professionals entering workforce to reduce, truly do no harm” |
| *Businesses, funding organizations, and policymakers need to collaborate to accelerate policy and systems change* | “Business and philanthropy need to partner with state and federal leaders to identify and address upstream needs of populations with poor outcomes, including policy and systems change.” |

Workshop Evaluation Results

| **Workshop #1 Evaluation Results** (Total Workshop Participant = 47) | | | | | |
| --- | --- | --- | --- | --- | --- |
|  | Strongly Agree | Agree | Neutral | Total | % Strongly Agree or Agree |
| *Overall, I am very satisfied with my experience at this workshop.* | 13 | 9 | 3 | 25 | 88% |
| *This workshop increased my knowledge related to systems mapping and/or birth equity.* | 12 | 10 | 2 | 24 | 92% |
| *The information and tools presented at this workshop are relevant to my professional needs.* | 15 | 7 | 1 | 23 | 96% |
| *I will be able to apply one or more of the ideas, concepts, or tools from this workshop to my work.* | 14 | 5 | 4 | 23 | 83% |
| **Workshop #2 Evaluation Results** (Total Workshop Participants = 31) | | | | | |
|  | Strongly Agree | Agree | Neutral | Total | % Strongly Agree or Agree |
| *Overall, I am very satisfied with my experience at this workshop.* | 8 | 3 | 0 | 11 | 100% |
| *This workshop increased my knowledge related to systems mapping and/or birth equity.* | 5 | 5 | 0 | 10 | 100% |
| *The information and tools presented at this workshop are relevant to my professional needs.* | 9 | 0 | 0 | 9 | 100% |
| *I will be able to apply one or more of the ideas, concepts, or tools from this workshop to my work.* | 4 | 5 | 0 | 9 | 100% |
